# Supplementary material for: Nitrogen fertilizer reduction in combination with Azolla cover for reducing ammonia volatilization and improving nitrogen use efficiency of rice
Source: PeerJ. 2021 Mar 16;9:e11077. doi: 10.7717/peerj.11077 (PMC7986579; doi:10.7717/peerj.11077)
Supplement: Supplemental Information 1 [file peerj-09-11077-s001.xlsx]

## Sheet: Sheet1
NH3 emission flux (kg N ha-1 d-1)
Basal fertilization period	2019-06-29			2019-06-30			2019-07-01			2019-07-03			2019-07-05
Control	0.12	0.48	0.30379	0.31648	0.42218	0.36933	0.22354	0.45374	0.33864	0.01522	0.02268	0.01895	0.02614	0.05134	0.03874
A	0.18165	0.54745	0.36455	0.39035	0.49605	0.4432	0.56218	0.79238	0.67728	0.02469	0.03215	0.02842	0.03389	0.05909	0.04649
FN	1.38234	2.5575	0.989747	4.91833	5.44272	3.16478	8.25342	8.8334	8.92818	3.42089	5.45316	4.05868	0.355839	0.285452	0.472866
FNA	0.941724	1.0247	1.14655	3.0528	3.3177	3.2789	7.42273	6.40173	6.89039	3.0458	2.79055	3.58675	0.319673	0.308599	0.335541
RN15	1.77804	0.733758	2.4065	2.85319	2.09966	2.6351	7.32711	5.87791	5.48532	2.73019	2.21541	3.13062	0.403499	0.327949	0.246047
RN15A	0.598743	0.440583	0.484074	1.4928	1.30966	1.31543	3.07386	4.92943	5.02409	1.73104	2.23219	3.04408	0.303355	0.356688	0.306382
RN30	1.60716	1.52902	0.995861	2.20558	1.53273	2.10945	3.60815	2.81413	4.39281	1.84779	2.28527	1.86902	0.301881	0.314637	0.274149
RN30A	0.555623	0.209687	0.56436	0.82051	0.589571	0.803723	2.54848	2.60487	2.97257	1.15335	1.25314	1.91881	0.290616	0.2787	0.252845
Tillering fertilization period	2019-07-06			2019-07-07			2019-07-08			2019-07-10			2019-07-12
Control	0.03626	0.05096	0.04361	0.13501	0.20355	0.16928	0.1638	0.20918	0.18649	0.07611	0.09925	0.08768	0.08707	0.11735	0.10221
A	0.04498	0.05968	0.05233	0.16887	0.23741	0.20314	0.2384	0.28378	0.26109	0.11995	0.14309	0.13152	0.10751	0.13779	0.12265
FN	0.691171	1.27875	0.494873	2.45916	2.431	1.882	4.12671	4.4167	4.46409	2.05254	2.90835	2.70579	0.593064	0.475754	0.630488
FNA	0.470862	0.51235	0.573277	1.5264	1.65885	1.63945	3.71137	3.84104	3.7323	1.82748	1.9698	2.15205	0.532788	0.514331	0.559236
RN15	0.889019	0.366879	1.20325	1.14127	1.25979	1.31755	2.93084	3.52674	3.29119	1.63811	0.830777	1.87837	0.672498	0.546582	0.410078
RN15A	0.299372	0.220292	0.242037	0.746398	0.654828	0.657713	1.53693	2.46471	2.51205	1.03862	1.33931	1.82645	0.505591	0.59448	0.510637
RN30	0.80358	0.764512	0.597517	1.10279	0.919637	1.05473	1.80408	1.40706	2.1964	1.10868	1.37116	1.12141	0.503135	0.524395	0.456914
RN30A	0.277812	0.104844	0.28218	0.410255	0.294786	0.401861	1.27424	1.30243	1.48628	0.692013	0.751885	1.15129	0.48436	0.4645	0.421408
Panicle fertilization period	2019-08-06			2019-08-07			2019-08-08			2019-08-10			2019-08-12
Control	0.1524	0.72318	0.43779	0.15352	0.24336	0.19844	0.12499	0.14231	0.13365	0.12443	0.14731	0.13587	0.07476	0.08512	0.07994
A	0.23996	0.81074	0.52535	0.19321	0.28305	0.23813	0.19181	0.20913	0.20047	0.1516	0.17448	0.16304	0.09075	0.10111	0.09593
FN	0.182534	0.261798	0.211748	5.50783	5.00487	4.4952	4.40728	3.44934	5.07165	1.97277	1.39788	2.02519	0.567	0.38092	0.49
FNA	0.242095	0.212994	0.215372	4.32745	3.91791	4.33582	3.21022	3.81217	4.49212	1.32099	2.10208	1.36119	0.239377	0.196405	0.403567
RN15	0.182194	0.203822	0.199179	2.19315	2.57172	2.65789	3.17815	2.53939	1.14582	1.41433	1.10256	1.87021	0.462	0.401	0.448
RN15A	0.239943	0.287841	0.213333	2.2015	1.972	1.8096	2.151	1.94242	1.914	0.840425	0.877113	2.18599	0.218429	0.359972	0.10426
RN30	0.217749	0.338004	0.211069	1.08345	1.88535	1.68334	2.1861	1.49053	1.49302	1.90505	0.743836	0.880962	0.295315	0.269045	0.270856
RN30A	0.232696	0.287502	0.258401	1.49648	1.59173	0.916405	1.05444	1.21772	1.42301	0.836589	1.02848	0.961217	0.157806	0.39666	0.332003
NH4+-N concentration
Basal fertilization period	2019-06-29		2019-06-30		2019-07-01		2019-07-03		2019-07-05
Control	0.50435	0.60095	0.21735	0.1456	0.57995	0.4816	1.39265	1.05245	0.65695	0.6853
A	1.0703	1.24985	6.9797	0.83125	9.9792	1.8641	7.65135	1.8424	2.2036	0.90685
FN	27.475	35.063	71.1984	75.4488	64.9596	54.4285	26.902	16.849	6.78195	7.50829
FNA	16.3163	22.8336	62.7991	67.27	37.471	46.34	12.7043	15.7783	3.92621	2.99434
RN15	22.771	28.021	59.5724	61.8443	37.364	38.498	16.7699	9.92845	5.12102	3.82489
RN15A	17.3068	15.6097	45.962	42	25.9661	31.9662	7.0042	13.3413	2.95715	2.20824
RN30	23.2694	23.0142	40.376	43.05	29.85	33.552	10.5084	12.2696	3.74465	2.9456
RN30A	10.5514	12.8153	21.469	22.967	18.9222	22.377	8.69365	9.7447	1.49485	1.904
Tillering fertilization period	2019-07-06		2019-07-07		2019-07-08		2019-07-10		2019-07-12
Control	0.36025	0.42925	0.15525	0.104	0.41425	0.344	0.99475	0.75175	0.46925	0.4895
A	0.7645	0.89275	4.9855	0.59375	7.128	1.3315	5.46525	1.316	1.574	0.64775
FN	19.625	25.045	50.856	53.892	37.1198	38.8775	19.2157	16.849	4.84425	5.36306
FNA	11.6545	16.3098	44.8565	48.05	26.765	33.1	12.7043	11.2702	2.80444	2.13881
RN15	16.265	20.015	42.5517	44.1745	23.3525	24.0613	11.9785	8.5101	3.65787	2.73206
RN15A	12.362	11.1498	32.83	30	18.5472	22.833	5.003	11.4354	2.11225	1.57731
RN30	13.2968	13.151	28.84	24.6	14.925	16.776	7.506	8.764	2.67475	2.104
RN30A	7.53675	9.15375	15.335	16.405	12.6148	14.918	6.20975	6.9605	1.06775	1.36
Panicle fertilization period	2019-08-06		2019-08-07		2019-08-08		2019-08-10		2019-08-12
Control	0.3661	0.5119	0.035	0.0249	0.753	0.4755	2.498	1.3212	0.2047	0.481
A	3.0702	0.6426	0.1093	1.101	5.28	5.916	0.3776	0.4818	0.1353	0.214
FN	16.013	17.645	61.213	62.939	52.365	56.448	19.378	20.656	2.62	2.7
FNA	4.855	6.672	57.532	60.354	50.322	51.589	18.728	18.566	1.64	2.22
RN15	9.44	15.635	52.169	50.95	47.339	43.224	15.544	15.69	3.16	3.11
RN15A	4.617	11.36	45.214	48.292	41.905	38.241	10.258	10.72	2.27	2.7
RN30	20.243	13.822	35.974	44.444	28.443	29.281	6.016	10.918	2.9	2.343
RN30A	13.602	7.04	25.438	31.224	28.503	21.577	6.756	4.2	3.47	2.307
pH	2019-06-29	2019-06-30	2019-07-01	2019-07-03	2019-07-05	2019-07-06	2019-07-07	2019-07-08	2019-07-10	2019-07-12	2019-08-06	2019-08-07	2019-08-08	2019-08-10	2019-08-12
Control	7.77333	7.67667	7.34333	7.84667	8.10333	7.50667	7.75333	7.78	7.34333	7.75	8.10333	7.79	8.08	7.52	7.78333
A	7.10667	7.74333	7.51333	7.67	7.69667	7.10667	7.54333	7.71333	7.67	7.69667	8.05667	7.64	7.84333	7.49	7.68
FN	8.47333	8.15	7.58667	8.28333	8.39	7.64	8.47333	8.35	8.08667	7.98	8.39	8.48667	8.45333	7.67667	7.60667
FNA	8.31667	8.07333	8.03333	8.11333	8.10667	7.89667	8.31667	8.17333	8.03333	8.01333	8.10667	8.31667	8.58	7.71333	7.72
RN15	8.44667	8.23333	7.85333	8.24	7.47	7.95	8.44667	8.23333	7.95333	7.84	7.47	8.45	8.23333	7.96667	7.62
RN15A	8.29667	7.97	8.16667	8.16667	8.32667	8.05333	8.26667	7.97	8.07	7.87	8.32667	8.19333	8.25667	7.88	7.31333
RN30	8.50667	8.27	7.72667	7.82	8.27	7.68333	8.50667	8.07	7.92667	7.62	8.27	7.86667	8.26	7.88333	7.78
RN30A	8.01333	7.72667	7.97667	7.87667	8.43667	7.61667	8.01333	7.72667	7.87667	7.77667	8.43667	7.82	8.62	7.73	7.59667
NH3 volatilization (kg N ha-1)	Basal fertilization period			Tillering fertilization period			Tillering fertilization period			Total NH3 emission
Treatment	R1	R2	R3	R1	R2	R3	R1	R2	R3	R1	R2	R3
Control	1.14644	1.07715	1.15481	0.795765	0.780602	0.739128	1.13036	1.217	1.275	3.07256	3.07475	3.16893
A	1.7644	1.64533	1.49481	0.915	1.1	1.06	1.62	1.51	1.32	4.2994	4.25533	3.87481
FN	22.1075	28.3109	22.1458	12.5682	14.8947	13.5135	15.1772	12.2736	14.809	49.853	55.4791	50.4683
FNA	18.1482	16.9424	19.1604	10.4292	10.9805	11.3676	10.9005	12.54	12.5728	39.4778	40.463	43.1008
RN15	18.2257	13.798	17.2802	9.58236	7.90813	10.3889	9.30615	8.32206	8.6393	37.1142	30.0282	36.3084
RN15A	9.23419	11.8574	13.5245	5.67113	7.20742	8.08596	6.71015	6.67643	8.51743	21.6155	25.7413	30.1279
RN30	11.7202	11.0757	11.7845	6.93407	6.88232	7.0053	7.88804	5.73965	5.69107	26.5423	23.6976	24.4808
RN30A	6.81255	6.46781	8.68396	4.31505	4.13483	5.31572	4.7724	5.94723	5.18426	15.9	16.5499	19.1839
Grain yield (g pot-1)	R1	R2	R3		Straw yield (g pot-1)	R1	R2	R3		Total biomass (g pot-1)	R1	R2	R3		Harvest index	R1	R2	R3
Control	59.6933	56.7808	53.9647		Control	36.7067	31.6392	48.9553		Control	96.4	88.42	102.92		Control	0.619206	0.642184	0.524321
A	68.4343	57.596	61.908		A	50.1757	40.054	35.742		A	118.61	97.65	97.65		A	0.576958	0.589796	0.60265
FN	82.784	73.7723	87.2107		FN	93.596	82.4677	76.7693		FN	176.38	156.24	163.98		FN	0.469359	0.472173	0.531846
FNA	88.7444	83.7424	78.4125		FNA	88.9156	93.3976	101.738		FNA	167.66	187.14	180.15		FNA	0.509355	0.447476	0.464546
RN15	86.02	77.1244	77.168		RN15	66.8	82.6256	82.472		RN15	152.82	159.75	159.64		RN15	0.552297	0.551874	0.450692
RN15A	90.5	88.2655	76.76		RN15A	84.19	89.6345	97.3933		RN15A	168.69	177.9	180.15		RN15A	0.500188	0.496163	0.463873
RN30	72.59	70.599	66.94		RN30	53.63	62.741	45.59		RN30	126.22	133.34	112.53		RN30	0.606828	0.522518	0.58384
RN30A	79.1533	77.42	69.6825		RN30A	81.6167	75.59	90.21		RN30A	160.77	149.01	163.89		RN30A	0.492327	0.519559	0.425178
Total N uptake/total chemical N applied efficiency (kg kg-1)	R1	R2	R3		Apparent nitrogen recovery efficiency (%)	R1	R2	R3
FN	0.638664	0.610964	0.682571		FN	36.265	28.0377	33.7722
FNA	0.725325	0.719308	0.682375		FNA	44.9311	38.8721	33.7525
RN15	0.67917	0.825603	0.808228		RN15	35.3868	43.5983	40.1798
RN15A	0.856167	0.816943	0.88535		RN15A	53.0864	42.7323	47.892
RN30	0.746658	0.864347	0.837764		RN30	35.0637	39.0027	34.298
RN30A	0.86884	0.943258	0.916976		RN30A	47.282	46.8938	42.2192
Yield-scaled NH3 emission (g N kg-1 grain)	R1	R2	R3
Control	0.257362	0.270756	0.293612
A	0.314126	0.369412	0.312949
FN	3.01103	3.76016	2.89347
FNA	2.22424	2.41592	2.74834
RN15	2.1573	1.94674	2.35256
RN15A	1.19422	1.45817	1.96247
RN30	1.82824	1.67833	1.82857
RN30A	1.00438	1.06884	1.37652
